# Supplementary material for: The use of comparative genomic hybridization to characterize genome dynamics and diversity among the serotypes of Shigella
Source: PubMed Central journal article supplement (PMC3225857; doi:10.1186/1471-2164-7-218), 2006-08-29
Supplement: 1471-2164-7-218-S4.pdf [file 1471-2164-7-218-S4.pdf]

| ORFs that are present in F6 but absent in other <i>S. flexneri</i> strains |         |                                                                      | ORFs that are absent in F6 but present in other <i>S. flexneri</i> strains |         |                                                                                          |
|----------------------------------------------------------------------------|---------|----------------------------------------------------------------------|----------------------------------------------------------------------------|---------|------------------------------------------------------------------------------------------|
| Gene                                                                       | Synonym | Product                                                              | Gene                                                                       | Synonym | Product                                                                                  |
| htrE                                                                       | b0139   | probable outer membrane porin protein involved in fimbrial assembly  | yaaV                                                                       | b0033a  | Uncharacterized conserved protein                                                        |
| ecpD                                                                       | b0140   | probable pilin chaperone similar to PapD                             | caiF                                                                       | b0034   | transcriptional regulator of cai operon                                                  |
| yadN                                                                       | b0141   | putative fimbrial-like protein                                       | caiD                                                                       | b0036   | carnitine racemase                                                                       |
| yaeI                                                                       | b0164   | orf, hypothetical protein                                            | caiC                                                                       | b0037   | probable crotonobetaine/carnitine-CoA ligase                                             |
| yagF                                                                       | b0269   | putative dehydratase                                                 | caiB                                                                       | b0038   | l-carnitine dehydratase                                                                  |
| yagI                                                                       | b0272   | putative regulator                                                   | caiA                                                                       | b0039   | probable carnitine operon oxidoreductase                                                 |
| ykgJ                                                                       | b0288   | putative ferredoxin                                                  | caiT                                                                       | b0040   | probable carnitine transporter                                                           |
| yagW                                                                       | b0290   | putative receptor                                                    | fixX                                                                       | b0044   | putative ferredoxin                                                                      |
| yagY                                                                       | b0292   | orf, hypothetical protein                                            | fhuA                                                                       | b0150   | outer membrane protein receptor for ferrichrome, colicin M, and phages T1, T5, and phi80 |
| yagZ                                                                       | b0293   | orf, hypothetical protein                                            | yafN                                                                       | b0232   | orf, hypothetical protein                                                                |
| ykgK                                                                       | b0294   | putative regulator                                                   | yafO                                                                       | b0233   | orf, hypothetical protein                                                                |
| eaeH                                                                       | b0297   | attaching and effacing protein, pathogenesis factor                  | ylbB                                                                       | b0516   | putative hydantoin utilization protein                                                   |
| ykgA                                                                       | b0300   | putative ARAC-type regulatory protein                                | nmpC                                                                       | b0553   | outer membrane porin protein; locus of qsr prophage                                      |
| b0499                                                                      | b0499   | orf, hypothetical protein                                            | ybcH                                                                       | b0567   | orf, hypothetical protein                                                                |
| ybbD                                                                       | b0500   | orf, hypothetical protein                                            | nfrA                                                                       | b0568   | bacteriophage N4 receptor, outer membrane protein                                        |
| b0501                                                                      | b0501   | orf, hypothetical protein                                            | nfrB                                                                       | b0569   | bacteriophage N4 receptor, outer membrane protein                                        |
| b0502                                                                      | b0502   | orf, hypothetical protein                                            | ybcZ                                                                       | b0570   | putative 2-component sensor protein                                                      |
| ybfP                                                                       | b0689   | putative pectinase                                                   | ylcA                                                                       | b0571   | putative 2-component transcriptional regulator                                           |
| ybfG                                                                       | b0690   | orf, hypothetical protein                                            | ylcB                                                                       | b0572   | putative resistance protein                                                              |
| ybfH                                                                       | b0691   | orf, hypothetical protein                                            | ybdO                                                                       | b0603   | putative transcriptional regulator LYSR-type                                             |
| rhcC                                                                       | b0700   | rhcC protein in rhs element                                          | ybeT                                                                       | b0647   | orf, hypothetical protein                                                                |
| b0703                                                                      | b0703   | orf, hypothetical protein                                            | ybeU                                                                       | b0648   | putative tRNA ligase                                                                     |
| putA                                                                       | b1014   | proline dehydrogenase, P5C dehydrogenase                             | hrsA                                                                       | b0731   | protein modification enzyme, induction of ompC                                           |
| putP                                                                       | b1015   | major sodium/proline symporter                                       | ybhH                                                                       | b0769   | orf, hypothetical protein                                                                |
| msyB                                                                       | b1051   | acidic protein suppresses mutants lacking function of protein export | ybhI                                                                       | b0770   | putative membrane pump protein                                                           |
| ycfA                                                                       | b1156   | orf, hypothetical protein                                            | ybiI                                                                       | b0803   | orf, hypothetical protein                                                                |
| b1157                                                                      | b1157   | putative tail fiber protein                                          | b0805                                                                      | b0805   | putative outer membrane receptor for iron transport                                      |
| b1169                                                                      | b1169   | putative ATP-binding component of a transport system                 | ybiM                                                                       | b0806   | orf, hypothetical protein                                                                |
| ychG                                                                       | b1239   | orf, hypothetical protein                                            | ycbS                                                                       | b0940   | putative outer membrane protein                                                          |
| yciQ                                                                       | b1268   | orf, hypothetical protein                                            | b0941                                                                      | b0941   | homolog of Salmonella FimH protein                                                       |
| ydaH                                                                       | b1336   | putative pump protein (transport)                                    | b0942                                                                      | b0942   | putative fimbrial-like protein                                                           |
| ydaJ                                                                       | b1338   | putative aminohydrolase (EC 3.5.1.14)                                | b0943                                                                      | b0943   | putative fimbrial-like protein                                                           |
| ydaK                                                                       | b1339   | putative transcriptional regulator LYSR-type                         | agp                                                                        | b1002   | periplasmic glucose-1-phosphatase                                                        |
| recE                                                                       | b1350   | exonuclease VIII, ds DNA exonuclease, 5' --> 3' specific             | wrbA                                                                       | b1004   | trp repressor binding protein; affects association of trp repressor and operator         |
| b1365                                                                      | b1365   | orf, hypothetical protein                                            | yedF                                                                       | b1005   | orf, hypothetical protein                                                                |
| b1391                                                                      | b1391   | orf, hypothetical protein                                            | yedG                                                                       | b1006   | putative transport protein                                                               |
| b1433                                                                      | b1433   | putative membrane transport protein                                  | b1007                                                                      | b1007   | orf, hypothetical protein                                                                |
| ydcN                                                                       | b1434   | orf, hypothetical protein                                            | b1009                                                                      | b1009   | putative acetyltransferase                                                               |
| ydcP                                                                       | b1435   | putative collagenase                                                 | b1010                                                                      | b1010   | orf, hypothetical protein                                                                |
| -                                                                          | b1436   | orf, hypothetical protein                                            | b1011                                                                      | b1011   | putative synthetase                                                                      |
| -                                                                          | b1438   | orf, hypothetical protein                                            | b1012                                                                      | b1012   | orf, hypothetical protein                                                                |
| b1451                                                                      | b1451   | putative outer membrane receptor for iron transport                  | yciG                                                                       | b1259   | orf, hypothetical protein                                                                |
| b1452                                                                      | b1452   | putative receptor                                                    | ycjU                                                                       | b1317   | putative beta-phosphoglucomutase                                                         |
| ansP                                                                       | b1453   | L-asparagine permease                                                | ycjV                                                                       | b1318   | putative ATP-binding component of a transport system                                     |

|       |        |                                                                      |       |       |                                                                              |
|-------|--------|----------------------------------------------------------------------|-------|-------|------------------------------------------------------------------------------|
| b1486 | b1486  | putative transport system permease protein                           | ompG  | b1319 | outer membrane protein                                                       |
| b1487 | b1487  | putative hemin-binding lipoprotein                                   | ycjX  | b1321 | putative EC 2.1 enzymes                                                      |
| ydeH  | b1535  | orf, hypothetical protein                                            | narZ  | b1468 | cryptic nitrate reductase 2, alpha subunit                                   |
| dicB  | b1575  | inhibition of cell division                                          | narU  | b1469 | nitrite extrusion protein 2                                                  |
| yoaG  | b1796  | orf, hypothetical protein                                            | b1470 | b1470 | orf, hypothetical protein                                                    |
| yeaR  | b1797  | orf, hypothetical protein                                            | b1471 | b1471 | putative glycoprotein                                                        |
| yeaS  | b1798  | orf, hypothetical protein                                            | ydeY  | b1514 | putative transport system permease protein                                   |
| yeaT  | b1799  | putative transcriptional regulator LYSR-type                         | b1516 | b1516 | putative LACI-type transcriptional regulator                                 |
| yeaU  | b1800  | putative tartrate dehydrogenase                                      | yneB  | b1517 | orf, hypothetical protein                                                    |
| yeaV  | b1801  | putative transport protein                                           | b1518 | b1518 | orf, hypothetical protein                                                    |
| yodB  | b1974  | putative cytochrome                                                  | b1519 | b1519 | putative enzyme                                                              |
| b1978 | b1978  | putative factor                                                      | b1520 | b1520 | orf, hypothetical protein                                                    |
| b2246 | b2246  | putative transport protein                                           | uxaB  | b1521 | altronate oxidoreductase                                                     |
| b2247 | b2247  | putative racemase                                                    | b1522 | b1522 | orf, hypothetical protein                                                    |
| b2248 | b2248  | putative regulator                                                   | b1523 | b1523 | orf, hypothetical protein                                                    |
| b2353 | b2353  | orf, hypothetical protein                                            | yneH  | b1524 | putative glutaminase                                                         |
| b2354 | b2354  | orf, hypothetical protein                                            | b1525 | b1525 | putative aldehyde dehydrogenase                                              |
| b2430 | b2430  | putative beta-lactamase                                              | b1527 | b1527 | orf, hypothetical protein                                                    |
| b2459 | b2459  | orf, hypothetical protein                                            | ydeA  | b1528 | putative resistance / regulatory protein                                     |
| b2520 | b2520  | orf, hypothetical protein                                            | ydeB  | b1529 | orf, hypothetical protein                                                    |
| chpA  | b2782  | probable growth inhibitor, PemK-like, autoregulated                  | marA  | b1531 | multiple antibiotic resistance; transcriptional activator of defense systems |
| chpR  | b2783  | suppressor of inhibitory function of ChpA, PemeI-like, autoregulated | marB  | b1532 | multiple antibiotic resistance protein                                       |
| ygeV  | b2869  | putative transcriptional regulator                                   | ydeD  | b1533 | orf, hypothetical protein                                                    |
| ygeY  | b2872  | putative deacetylase                                                 | ydeF  | b1534 | putative transport protein                                                   |
| b2873 | b2873  | orf, hypothetical protein                                            | rem   | b1561 | orf, hypothetical protein                                                    |
| yqeA  | b2874  | putative kinase                                                      | relE  | b1563 | orf, hypothetical protein                                                    |
| b2875 | b2875  | putative synthases                                                   | relB  | b1564 | negative regulator of translation                                            |
| ygfJ  | b2877  | orf, hypothetical protein                                            | b1565 | b1565 | orf, hypothetical protein                                                    |
| yghD  | b2968  | putative secretion pathway protein                                   | rspA  | b1581 | starvation sensing protein                                                   |
| yghE  | b2969  | putative general secretion pathway for protein export (GSP)          | b1583 | b1583 | orf, hypothetical protein                                                    |
| b2970 | b2970  | putative general secretion pathway for protein export (GSP)          | b1690 | b1690 | putative transport system permease protein                                   |
| envR  | b3264  | putative transcriptional regulator                                   | b1730 | b1730 | orf, hypothetical protein                                                    |
| yrhB  | b3446  | orf, hypothetical protein                                            | b1731 | b1731 | orf, hypothetical protein                                                    |
| rhsB  | b3482  | rhsB protein in rhs element                                          | katE  | b1732 | catalase; hydroperoxidase HPII(III)                                          |
| rhsA  | b3593  | rhsA protein in rhs element                                          | ydjC  | b1733 | orf, hypothetical protein                                                    |
| yibJ  | b3595  | orf, hypothetical protein                                            | celF  | b1734 | phospho-beta-glucosidase; cryptic                                            |
| yibG  | b3596  | orf, hypothetical protein                                            | b1762 | b1762 | orf, hypothetical protein                                                    |
| yifN  | b3777m | Uncharacterized conserved protein                                    | ydjE  | b1769 | putative transport protein                                                   |
| yiiG  | b3896  | orf, hypothetical protein                                            | b1770 | b1770 | putative DEOR-type transcriptional regulator                                 |
| htrC  | b3989  | heat shock protein htrC                                              | b1771 | b1771 | orf, hypothetical protein                                                    |
| yjfI  | b4181  | orf, hypothetical protein                                            | b1772 | b1772 | putative kinase                                                              |
| yjfJ  | b4182  | putative alpha helical protein                                       | b1773 | b1773 | putative aldolase                                                            |
| yjfK  | b4183  | orf, hypothetical protein                                            | ydjJ  | b1774 | putative oxidoreductase                                                      |
| yjiJ  | b4332  | putative transport protein                                           | b1775 | b1775 | putative transport protein                                                   |
| yjiK  | b4333  | orf, hypothetical protein                                            | b1776 | b1776 | putative oxidoreductase                                                      |
| yjiL  | b4334  | putative enzyme                                                      | amn   | b1982 | AMP nucleosidase                                                             |

|         |         |                                            |        |       |                                                                           |
|---------|---------|--------------------------------------------|--------|-------|---------------------------------------------------------------------------|
| yjiM    | b4335   | orf, hypothetical protein                  | nac    | b1988 | nitrogen assimilation control protein                                     |
| yjiN    | b4336   | orf, hypothetical protein                  | wzzB   | b2027 | regulator of length of O-antigen component of lipopolysaccharide chains   |
| yjiO    | b4337   | putative transport protein                 | wcaJ   | b2047 | putative colanic acid biosynthesis UDP-glucose lipid carrier transferase  |
| yjiQ    | b4339   | orf, hypothetical protein                  | yohM   | b2106 | orf, hypothetical protein                                                 |
| yjiS    | b4341   | orf, hypothetical protein                  | b2107  | b2107 | orf, hypothetical protein                                                 |
| yjiT    | b4342   | orf, hypothetical protein                  | yehA   | b2108 | putative type-1 fimbrial protein                                          |
| SBO0564 | SBO0564 | orf, hypothetical protein                  | yehB   | b2109 | putative outer membrane protein                                           |
| SBO4343 | SBO4343 | orf, conserved hypothetical protein        | yehC   | b2110 | putative chaperone                                                        |
| SBO4397 | SBO4397 | putative protein encoded within IS         | yehD   | b2111 | putative fimbrial-like protein                                            |
| SBO0748 | SBO0748 | repressor protein                          | yehE   | b2112 | orf, hypothetical protein                                                 |
| SBO0749 | SBO0749 | orf, conserved hypothetical protein        | molR_1 | b2115 | molybdate metabolism regulator, first fragment                            |
| SBO0752 | SBO0752 | possible endonuclease                      | molR_2 | b2116 | molybdate metabolism regulator, second fragment 2                         |
| SBO0753 | SBO0753 | putative damage-inducible protein          | yeiL   | b2163 | putative transcriptional regulator                                        |
| SBO0754 | SBO0754 | putative phage-related protein             | b2229  | b2229 | orf, hypothetical protein                                                 |
| SBO0755 | SBO0755 | putative phage-related protein             | b2350  | b2350 | orf, hypothetical protein                                                 |
| SBO0757 | SBO0757 | probable capsid portal protein (fragment)  | b2420  | b2420 | orf, hypothetical protein                                                 |
| SBO0767 | SBO0767 | putative regulatory protein                | b2504  | b2504 | orf, hypothetical protein                                                 |
| SBO0768 | SBO0768 | putative phage tail protein                | pheA   | b2599 | chorismate mutase-P and prephenate dehydratase                            |
| SBO0775 | SBO0775 | probable major tail tube protein           | smpA   | b2617 | small membrane protein A                                                  |
| SBO0776 | SBO0776 | putative phage tail protein                | ygaE   | b2664 | putative transcriptional regulator                                        |
| SBO0777 | SBO0777 | putative bacteriophage tail protein        | stpA   | b2669 | DNA-binding protein; H-NS-like protein; chaperone activity; RNA splicing? |
| SBO0779 | SBO0779 | putative bacteriophage late gene regulator | nrdE   | b2675 | ribonucleoside-diphosphate reductase 2, alpha subunit                     |
| SBO0780 | SBO0780 | putative bacteriophage late gene regulator | srlD   | b2705 | glucitol (sorbitol)-6-phosphate dehydrogenase                             |
| SBO0856 | SBO0856 | putative nucleotide sugar epimerase        | hypF   | b2712 | transcriptional regulatory protein                                        |
| wzy     | SBO0860 | O-antigen polymerase                       | pphB   | b2734 | protein phosphatase 2                                                     |
| SBO0907 | SBO0907 | orf, hypothetical protein                  | ygbO   | b2745 | putative hydrogenase subunit                                              |
| SBO0959 | SBO0959 | putative tail protein                      | ygcM   | b2765 | putative 6-pyruvoyl tetrahydrobiopterin synthase                          |
| SBO0971 | SBO0971 | unknown protein encoded by prophage        | ygcY   | b2788 | putative glucarate dehydratase                                            |
| SBO0973 | SBO0973 | putative transcriptional regulator         | fucK   | b2803 | L-fuculokinase                                                            |
| SBO1136 | SBO1136 | orf, hypothetical protein                  | b2809  | b2809 | orf, hypothetical protein                                                 |
| SBO1137 | SBO1137 | orf, hypothetical protein                  | ygdK   | b2811 | orf, hypothetical protein                                                 |
| SBO1138 | SBO1138 | orf, conserved hypothetical protein        | mltA   | b2813 | membrane-bound lytic murein transglycosylase A                            |
| SBO1139 | SBO1139 | transcriptional regulatory protein         | kduI   | b2843 | homolog of pectin degrading enzyme 5-keto 4-deoxyuronate isomerase        |
| SBO1140 | SBO1140 | putative integrase                         | ygfF   | b2902 | putative oxidoreductase                                                   |
| SBO1171 | SBO1171 | putative alpha-mannosidase                 | visC   | b2906 | orf, hypothetical protein                                                 |
| SBO1195 | SBO1195 | putative tail fiber protein                | ygfE   | b2910 | orf, hypothetical protein                                                 |
| SBO1222 | SBO1222 | putative integrase                         | ygfA   | b2912 | putative ligase                                                           |
| SBO1384 | SBO1384 | orf, hypothetical protein                  | yqfE   | b2915 | orf, hypothetical protein                                                 |
| SBO1385 | SBO1385 | putative bacteriophage late gene regulator | epd    | b2927 | D-erythrose 4-phosphate dehydrogenase                                     |
| SBO1386 | SBO1386 | putative tail sheath protein               | yggD   | b2929 | putative transcriptional regulator                                        |
| SBO1387 | SBO1387 | putative tail tube protein                 | b2931  | b2931 | putative oxidoreductase                                                   |
| SBO1396 | SBO1396 | probable phage baseplate assembly protein  | glcB   | b2976 | malate synthase G                                                         |
| SBO1398 | SBO1398 | putative phage baseplate assembly protein  | glcF   | b2978 | glycolate oxidase iron-sulfur subunit                                     |
| SBO1399 | SBO1399 | putative phage tail completion protein     | glcD   | b2979 | glycolate oxidase subunit D                                               |
| SBO1400 | SBO1400 | putative phage tail protein                | glcC   | b2980 | transcriptional activator for glc operon                                  |
| SBO1401 | SBO1401 | orf, hypothetical protein                  | b2981  | b2981 | orf, hypothetical protein                                                 |

|         |         |                                                     |        |        |                                                                                         |
|---------|---------|-----------------------------------------------------|--------|--------|-----------------------------------------------------------------------------------------|
| SBO1402 | SBO1402 | putative endolysin                                  | pitB   | b2987  | low-affinity phosphate transport                                                        |
| SBO1403 | SBO1403 | probable phage tail protein                         | b3027  | b3027  | orf, hypothetical protein                                                               |
| SBO1404 | SBO1404 | putative capsid completion protein                  | ugpB   | b3453  | sn-glycerol 3-phosphate transport system; periplasmic binding protein                   |
| SBO1405 | SBO1405 | putative phage terminase                            | t150   | b3558  | IS150 putative transposase                                                              |
| SBO1406 | SBO1406 | major capsid protein                                | yibH   | b3597  | putative membrane protein                                                               |
| SBO1409 | SBO1409 | probable capsid portal protein                      | mtlD   | b3600  | mannitol-1-phosphate dehydrogenase                                                      |
| SBO1410 | SBO1410 | putative phage-related protein                      | yibL   | b3602  | orf, hypothetical protein                                                               |
| SBO1411 | SBO1411 | putative stability/partitioning protein             | htrL   | b3618  | involved in lipopolysaccharide biosynthesis                                             |
| SBO1414 | SBO1414 | orf, conserved hypothetical protein                 | yidL   | b3680  | putative ARAC-type regulatory protein                                                   |
| SBO1923 | SBO1923 | orf, conserved hypothetical protein                 | dgoT   | b3691  | D-galactonate transport                                                                 |
| SBO1928 | SBO1928 | orf, conserved hypothetical protein                 | dgoA   | b3692  | 2-oxo-3-deoxygalactonate 6-phosphate aldolase and galactonate dehydratase               |
| SBO1938 | SBO1938 | putative integrase                                  | yidX   | b3696  | putative replicase EC 2.7.-                                                             |
| SBO3440 | SBO3440 | putative transposase                                | bgIB   | b3721  | phospho-beta-glucosidase B; cryptic                                                     |
| SBO2037 | SBO2037 | orf, conserved hypothetical protein                 | bgIF   | b3722  | PTS system beta-glucosides, enzyme II, cryptic                                          |
| SBO2123 | SBO2123 | orf, conserved hypothetical protein                 | yigF   | b3817  | orf, hypothetical protein                                                               |
| SBO2125 | SBO2125 | major capsid protein                                | yigG   | b3818  | orf, hypothetical protein                                                               |
| SBO2133 | SBO2133 | orf, hypothetical protein                           | yihL   | b3872  | putative transcriptional regulator                                                      |
| SBO2134 | SBO2134 | putative CP4-57-type integrase                      | yihS   | b3880  | orf, hypothetical protein                                                               |
| SBO2369 | SBO2369 | orf, conserved hypothetical protein                 | yihT   | b3881  | putative aldolase                                                                       |
| SBO2700 | SBO2700 | putative phosphoglycerate dehydrogenase             | yihU   | b3882  | putative dehydrogenase                                                                  |
| SBO2704 | SBO2704 | cystathionine beta-lyase; maltose regulon modulator | yihV   | b3883  | putative kinase                                                                         |
| SBO2706 | SBO2706 | orf, conserved hypothetical protein                 | yihW   | b3884  | putative DEOR-type transcriptional regulator                                            |
| ygcB    | SBO2759 | putative helicase                                   | arp    | b4017  | regulator of acetyl CoA synthetase                                                      |
| SBO2760 | SBO2760 | putative cytoplasmic protein                        | xylE   | b4031  | xylose-proton symport                                                                   |
| SBO2761 | SBO2761 | orf, conserved hypothetical protein                 | malG   | b4032  | part of maltose permease, inner membrane                                                |
| SBO2764 | SBO2764 | orf, conserved hypothetical protein                 | malF   | b4033  | part of maltose permease, periplasmic                                                   |
| ygbF    | SBO2766 | orf, conserved hypothetical protein                 | malE   | b4034  | periplasmic maltose-binding protein; substrate recognition for transport and chemotaxis |
| gspD    | SBO3012 | putative type II secretion protein                  | lamB   | b4036  | phage lambda receptor protein; maltose high-affinity receptor                           |
| gspE    | SBO3013 | putative type II secretion protein                  | malM   | b4037  | periplasmic protein of mal regulon                                                      |
| gspF    | SBO3014 | putative type II secretion protein                  | melB   | b4120  | melibiose permease II                                                                   |
| gspG    | SBO3015 | putative type II secretion protein                  | gntP   | b4321  | gluconate transport system permease 3                                                   |
| gspH    | SBO3016 | putative type II secretion protein                  | safA   | SF0202 | putative cytoplasmic protein                                                            |
| gspI    | SBO3017 | putative type II secretion protein                  | safB   | SF0203 | periplasmic chaperone of fimbrial assembly machinery                                    |
| gspJ    | SBO3018 | putative type II secretion protein                  | safC   | SF0204 | outer membrane usher protein                                                            |
| gspK    | SBO3019 | putative type II secretion protein                  | sat1   | SF0206 | putative cytoplasmic protein                                                            |
| SBO4079 | SBO4079 | putative transposase                                | sat2   | SF0207 | putative cytoplasmic protein                                                            |
| SBO3125 | SBO3125 | putative ribose ABC transporter                     | SF0208 | SF0208 | putative cytoplasmic protein                                                            |
| SBO3127 | SBO3127 | Ribose transport system permease protein rbsC       | SF0215 | SF0215 | putative terminase large subunit                                                        |
| SBO3129 | SBO3129 | possible carbohydrate kinase                        | SF0265 | SF0265 | putative Rhs-family protein                                                             |
| SBO3130 | SBO3130 | orf, conserved hypothetical protein                 | SF0592 | SF0592 | orf, hypothetical protein                                                               |
| SBO3247 | SBO3247 | orf, conserved hypothetical protein                 | SF0593 | SF0593 | putative Rhs-family protein (fragment)                                                  |
| SBO3248 | SBO3248 | putative tagatose-bisphosphate aldolase             | SF0669 | SF0669 | putative bacteriophage protein                                                          |
| SBO3250 | SBO3250 | possible carbohydrate kinase                        | SF0675 | SF0675 | putative bacteriophage protein                                                          |
| SBO4398 | SBO4398 | putative protein encoded within IS                  | SF0676 | SF0676 | orf, conserved hypothetical protein                                                     |
| SBO3417 | SBO3417 | orf, conserved hypothetical protein                 | SF0679 | SF0679 | putative bacteriophage protein                                                          |
| SBO3418 | SBO3418 | orf, conserved hypothetical protein                 | SF1131 | SF1131 | putative integrase of prophage CP-933C                                                  |

|         |         |                                                                        |        |        |                                                                                 |
|---------|---------|------------------------------------------------------------------------|--------|--------|---------------------------------------------------------------------------------|
| SBO3419 | SBO3419 | orf, conserved hypothetical protein                                    | SF1140 | SF1140 | putative head portal protein                                                    |
| SBO3421 | SBO3421 | hypothetical membrane protein                                          | SF1141 | SF1141 | putative head-tail adaptor                                                      |
| lpfA    | SBO3546 | putative major fimbrial subunit                                        | SF1145 | SF1145 | hypothetical bacteriophage protein                                              |
| waaW    | SBO3628 | UDP-galactose:(galactosyl) LPS alpha1,2-galactosyltransferase          | SF1146 | SF1146 | putative terminase of prophage CP-933C                                          |
| waaY    | SBO3629 | lipopolysaccharide core biosynthesis                                   | SF1180 | SF1180 | invasion plasmid antigen fragment                                               |
| waaJ    | SBO3630 | lipopolysaccharide 1,2-glucosyltransferase                             | SF1355 | SF1355 | putative bacteriophage protein                                                  |
| waaI    | SBO3631 | UDP-D-galactose:(glucosyl)lipopolysaccharide- alpha-1,3-D-galactosyltr | SF1544 | SF1544 | antitermination protein, homolog of cryptic prophage                            |
| SBO3649 | SBO3649 | hypothetical bacteriophage protein                                     | SF1756 | SF1756 | orf, conserved hypothetical protein                                             |
| SBO3650 | SBO3650 | putative anti-repressor protein                                        | SF1849 | SF1849 | putative integrase                                                              |
| SBO3735 | SBO3735 | orf, hypothetical protein                                              | SF1929 | SF1929 | orf, hypothetical protein                                                       |
| SBO3736 | SBO3736 | orf, hypothetical protein                                              | SF2039 | SF2039 | putative Q antiterminator of prophage                                           |
| SBO3737 | SBO3737 | orf, hypothetical protein                                              | SF2047 | SF2047 | putative integrase                                                              |
| SBO3738 | SBO3738 | orf, hypothetical protein                                              | SF2092 | SF2092 | orf, conserved hypothetical protein                                             |
| yihW    | SBO3885 | putative DEOR-type transcriptional regulator                           | SF2093 | SF2093 | orf, conserved hypothetical protein                                             |
| yihV    | SBO3886 | putative kinase                                                        | SF2094 | SF2094 | orf, conserved hypothetical protein                                             |
| rspB    | SBO3891 | putative dehydrogenase                                                 | rfbJ   | SF2095 | glycosyl transferase                                                            |
| SBO3897 | SBO3897 | putative transport protein, shikimate                                  | rfbI   | SF2096 | glycosyl translocase                                                            |
| SBO3898 | SBO3898 | orf, conserved hypothetical protein                                    | rfbG   | SF2098 | dTDP-rhamnosyl transferase                                                      |
| SBO4160 | SBO4160 | putative type I restriction-modification system specificity subunit    | rfbF   | SF2099 | dTDP-rhamnosyl transferase                                                      |
| SBO4163 | SBO4163 | putative phage-related protein                                         | rfbE   | SF2100 | polysaccharide biosynthesis protein                                             |
| SBO4165 | SBO4165 | putative DNA primase                                                   | SF2408 | SF2408 | orf, conserved hypothetical protein                                             |
| SBO4166 | SBO4166 | putative protein encoded in prophage                                   | SF2409 | SF2409 | similar to fimbrial protein                                                     |
| SBO4171 | SBO4171 | phage polarity suppression protein                                     | SF2495 | SF2495 | orf, conserved hypothetical protein                                             |
| SBO4172 | SBO4172 | orf, hypothetical protein                                              | SF2496 | SF2496 | orf, conserved hypothetical protein                                             |
| SBO4243 | SBO4243 | orf, conserved hypothetical protein                                    | SF2497 | SF2497 | orf, conserved hypothetical protein                                             |
| SBO4247 | SBO4247 | transport protein of hexuronates                                       | SF2498 | SF2498 | orf, conserved hypothetical protein                                             |
| SBO4323 | SBO4323 | orf, hypothetical protein                                              | SF2499 | SF2499 | putative amino acid antiporter                                                  |
| SBO4353 | SBO4353 | orf, conserved hypothetical protein                                    | SF2500 | SF2500 | similar to glutamate racemase                                                   |
| SBO4355 | SBO4355 | orf, hypothetical protein                                              | SF2619 | SF2619 | putative bacteriophage protein                                                  |
| SBO4393 | SBO4393 | putative penicillin G acylase                                          | SF2622 | SF2622 | orf, conserved hypothetical protein                                             |
| SBO4399 | SBO4399 | orf, conserved hypothetical protein                                    | SF2758 | SF2758 | putative phage transposase                                                      |
| SSO0240 | SSO0240 | orf, conserved hypothetical protein                                    | SF2759 | SF2759 | putative DNA-binding protein                                                    |
| SSO0323 | SSO0323 | putative dehydrogenase                                                 | SF2924 | SF2924 | putative serine protease                                                        |
| cjrA    | SSO2662 | putative iron-regulated protein                                        | SF2947 | SF2947 | orf, conserved hypothetical protein                                             |
| cjrB    | SSO2663 | putative membrane protein, TonB-like, colicin Js sensitive             | SF2948 | SF2948 | orf, conserved hypothetical protein                                             |
| senB    | SSO2665 | putative enterotoxin                                                   | SF2949 | SF2949 | orf, conserved hypothetical protein                                             |
|         |         |                                                                        | SF3004 | SF3004 | orf, hypothetical protein                                                       |
|         |         |                                                                        | SF3434 | SF3434 | PemK protein                                                                    |
|         |         |                                                                        | waaI   | SF3662 | lipid A-core, surface polymer ligase                                            |
|         |         |                                                                        | waaD   | SF3663 | lipopolysaccharide 1,2-N- acetylglucosaminetransferase                          |
|         |         |                                                                        | waaJ   | SF3664 | putative UDP-glucose:(galactosyl) LPS alpha1,2-galactosyltransferase            |
|         |         |                                                                        | waaY   | SF3665 | putative LPS biosynthesis protein                                               |
|         |         |                                                                        | waaL   | SF3666 | UDP-D-galactose:(glucosyl)lipopolysaccharide- alpha-1,3-D-galactosyltransferase |
|         |         |                                                                        | SF3698 | SF3698 | putative integrase                                                              |
|         |         |                                                                        | shiC   | SF3704 | orf, conserved hypothetical protein                                             |
|         |         |                                                                        | SF3707 | SF3707 | orf, conserved hypothetical protein                                             |

|        |        |                                                                           |
|--------|--------|---------------------------------------------------------------------------|
| SF3710 | SF3710 | orf, conserved hypothetical protein                                       |
| lpfC   | SF3723 | putative long polar fimbriae                                              |
| lpfA   | SF3807 | putative major fimbrial subunit                                           |
| SF3884 | SF3884 | orf, partial conserved hypothetical protein                               |
| SF4376 | SF4376 | orf, conserved hypothetical protein                                       |
| hpaA   | SF4377 | putative 4-hydroxyphenylacetate 3-monooxygenase operon regulatory protein |
| hpaX   | SF4378 | putative 4-hydroxyphenylacetate permease                                  |
