# Supplementary material for: The use of comparative genomic hybridization to characterize genome dynamics and diversity among the serotypes of Shigella
Source: PubMed Central journal article supplement (PMC3225857; doi:10.1186/1471-2164-7-218), 2006-08-29
Supplement: 1471-2164-7-218-S5.pdf [file 1471-2164-7-218-S5.pdf]

## Bacterial strains used from previous study

| Strain                         | Abbreviation | Serotype   | Source* |
|--------------------------------|--------------|------------|---------|
| <i>E. coli</i> EHEC O157 Sakai | O157 Sakai   | O157:H7    | RIMD    |
| <i>E. coli</i> EHEC O26        | EHEC         | O26        | RIMD    |
| <i>E. coli</i> EPEC B171       | EPEC-1       | O111:NM    | RIMD    |
| <i>E. coli</i> EPEC E2348/69   | EPEC-2       | O127:H6    | RIMD    |
| <i>E. coli</i> EPEC 5513-51    | EPEC-3       | O55:H6     | RIMD    |
| <i>E. coli</i> EPEC 4394-57    | EPEC-4       | O114:NM    | RIMD    |
| <i>E. coli</i> EPEC 1929-55    | EPEC-5       | O126:NM    | RIMD    |
| <i>E. coli</i> EPEC 1157-54    | EPEC-6       | O119:H6    | RIMD    |
| <i>E. coli</i> EPEC 1181-83    | EPEC-7       | O142:H6    | RIMD    |
| <i>E. coli</i> ETEC H10407     | ETEC-1       | O78:H11    | RIMD    |
| <i>E. coli</i> ETEC 31-10      | ETEC-2       | O25:H-     | RIMD    |
| <i>E. coli</i> EIEC 931-78     | EIEC-1       | O124       | RIMD    |
| <i>E. coli</i> EIEC 14185-83HU | EIEC-2       | O28ac      | RIMD    |
| <i>E. coli</i> EIEC 127-82FAV  | EIEC-3       | O29        | RIMD    |
| <i>E. coli</i> EIEC 282-83FAV  | EIEC-4       | O136       | RIMD    |
| <i>E. coli</i> UPEC Z42        | UPEC-1       | O2:H6      | RIMD    |
| <i>E. coli</i> UPEC C72        | UPEC-2       | O46:H52    | RIMD    |
| <i>E. coli</i> UPEC P17        | UPEC-3       | O129:NT    | RIMD    |
| <i>E. coli</i> REPEC REPEC-1   | REPEC        | O103:K-:H6 | RIMD    |
| <i>S. flexneri</i> 2a YSH6000  | S.f          |            | IMS     |
| <i>S. boydii</i> IID627        | S.b          |            | IMS     |
| <i>S. sonnei</i> phasel IID969 | S.s          |            | IMS     |

\*NAIST, Nara Institute of Science and Technology, Nara, Japan; RIMD, Research Institute for Microbial Diseases, Osaka University, Osaka, Japan; IMS, Laboratory of Culture Collection, Institute of Medical Science, University of Tokyo, Tokyo, Japan.
