# Supplementary material for: The use of comparative genomic hybridization to characterize genome dynamics and diversity among the serotypes of Shigella
Source: BMC Genomics. 2006 Aug 29;7:218. doi: 10.1186/1471-2164-7-218 (PMC3225857; doi:10.1186/1471-2164-7-218)
Supplement: Additional File 1 — Absent ORFs of E. coli K-12 strain MG1655 among Shigella spp. strains. [file 1471-2164-7-218-S1.pdf]

[illegible]

[illegible]
