# Supplementary material for: The use of comparative genomic hybridization to characterize genome dynamics and diversity among the serotypes of Shigella
Source: BMC Genomics. 2006 Aug 29;7:218. doi: 10.1186/1471-2164-7-218 (PMC3225857; doi:10.1186/1471-2164-7-218)
Supplement: Additional File 2 — ORFs in each Shigella genome related to main clinical biochemical reaction. [file 1471-2164-7-218-S2.pdf]

1:present 0:absent  
\* pseudogene
